1  
2  
3  
4  
5  
6  
7  
8  
9  
10  
11  
12  
13  
14  
15  
16  
17  
18  
19

# Linked supergenes underlie split sex ratio and social organization in an ant

German Lagunas-Robles <sup>1</sup>, Jessica Purcell <sup>2</sup>, and Alan Brelsford <sup>1\*</sup>

<sup>1</sup> Department of Evolution, Ecology and Organismal Biology

University of California, Riverside

Riverside, CA 92521

USA

<sup>2</sup> Department of Entomology

University of California, Riverside

Riverside, CA 92521

USA

\* Correspondence to [alan.brelsford@ucr.edu](mailto:alan.brelsford@ucr.edu)

## 20 **Abstract**

21 Sexually reproducing organisms usually invest equally in male and female offspring.  
22 Deviations from this pattern have led researchers to new discoveries in the study of  
23 parent-offspring conflict, genomic conflict, and cooperation. Some social insect species  
24 exhibit the unusual population-level pattern of split sex ratio, wherein some colonies  
25 specialize in the production of future queens and others specialize in the production of  
26 males. Theoretical work focused on the relatedness asymmetries emerging from  
27 haplodiploid inheritance, whereby queens are equally related to daughters and sons,  
28 but their daughter workers are more closely related to sisters than to brothers, led to a  
29 series of testable predictions and spawned many empirical studies of this phenomenon.  
30 However, not all empirical systems follow predicted patterns, so questions remain about  
31 how split sex ratio emerges. Here, we sequence the genomes of 138 *Formica glacialis*  
32 workers from 34 male-producing and 34 gyne-producing colonies to determine whether  
33 split sex ratio is under genetic control. We identify a supergene spanning 5.5 Mbp that  
34 is closely associated with sex allocation in this system. Strikingly, this supergene is  
35 adjacent to another supergene spanning 5 Mbp that is associated with variation in  
36 colony queen number. We identify a similar pattern in a second related species,  
37 *Formica podzolica*. The discovery that split sex ratio is determined, at least in part, by a  
38 supergene in two species opens a new line of research on the evolutionary drivers of  
39 split sex ratio.

## 40 **Significance Statement**

41 Some social insects exhibit split sex ratio, wherein some colonies produce future  
42 queens and others produce males. This phenomenon spawned many influential  
43 theoretical studies and empirical tests, both of which have advanced our understanding  
44 of parent-offspring conflicts and cooperation. However, some empirical systems did not  
45 follow theoretical predictions, indicating that researchers lack a comprehensive  
46 understanding of the drivers of split sex ratio. Here, we show that split sex ratio is  
47 associated with a large genomic region in two ant species. The discovery of a genetic  
48 basis for sex allocation in ants provides a novel explanation for this phenomenon,  
49 particularly in systems where empirical observations deviate from theoretical  
50 predictions.

51

## 52 Introduction

53 The relative investment in male versus female offspring is a vital fitness  
54 component of sexually reproducing organisms. Research on sex allocation theory has  
55 yielded breakthroughs in our understanding of topics as diverse as parent-offspring  
56 conflict, evolution of cooperation, and genomic conflict (1). Parent-offspring conflict is  
57 predicted to occur in subdivided populations with strong local mate competition, as seen  
58 in polyembryonic parasitoids (2), and in systems with relatedness asymmetry between  
59 sisters and brothers, as found in haplodiploid species such as the primitively eusocial  
60 wasp *Polistes chinensis antennalis* (3). Parental control of sex ratio is also thought to  
61 contribute to the maintenance of cooperative breeding; for example, Seychelles  
62 warblers living in high quality territories where helpers provide strong benefits produce  
63 an excess of females, the helping sex (4). However, similar patterns of biased sex  
64 allocation increasing the frequency of the helping sex are not found among all  
65 cooperatively breeding birds (5). The discovery of a chromosome that skews sex ratio  
66 from female-biased to 100% male in the jewel wasp *Nasonia vitripennis* was the first  
67 clear empirical illustration of an intragenomic conflict (6). This paternal sex ratio  
68 chromosome is transmitted through sperm to fertilized eggs, where it causes the loss of  
69 other paternally inherited chromosomes to produce exclusively male offspring (7, 8).  
70 Subsequent discoveries of sex ratio distorter systems take different forms, including  
71 female biased sex ratios mediated by endosymbionts (9, 10). These studies opened the  
72 door for additional research on intragenomic conflict in multiple contexts, including  
73 between sexes (11, 12) and between social insect castes (13).

74 Where there is intragenomic conflict, one resolution is evolution of suppressed  
75 recombination to reduce the frequency of deleterious multilocus genotypes. This is  
76 illustrated in the standard model of sex chromosome evolution (14, 15), in which  
77 selection favors the loss of recombination between a sexually antagonistic locus and a  
78 sex-determining locus on the same chromosome, eventually leading to a Y or W  
79 chromosome that is exclusively present in one sex. Under the “reduction principle” (16),  
80 this is also expected to occur around sex-ratio distorters. In line with this prediction, sex-  
81 ratio distorter loci often occur in regions of low recombination (17–20), but we lack  
82 evidence for the direction of causality. The reduction principle is also expected to

83 contribute to the formation of autosomal supergenes controlling other complex traits that  
84 involve epistatic interactions between two or more loci. Such supergenes have been  
85 found to control phenotypes including polymorphic wing coloration in butterflies, mating  
86 strategies in birds and fungi, self-incompatibility in plants, and colony social organization  
87 in ants (21–28). Autosomal supergenes, like sex chromosomes, are likely to represent  
88 the resolution of past intragenomic conflict between two or more loci.

89       Supergenes underlie at least two independently evolved cases of social  
90 polymorphism in ants. In the fire ant *Solenopsis invicta*, colony queen number is  
91 controlled by a supergene spanning most of a single chromosome (27). *Formica selysi*  
92 has a similar chromosome-spanning supergene underlying colony queen number, but  
93 there is no detectable overlap in gene content between the two (28). More recently, both  
94 ant social supergenes were shown to underlie colony queen number in other congeneric  
95 species (29, 30). In both systems, the haplotype associated with multi-queen (=   
96 polygyne) social structure is a selfish transmission distorter (31–33). These discoveries  
97 raise new questions about links between social structure and sex ratio that have been  
98 proposed in classic literature about sex allocation in Hymenoptera.

99       Trivers and Hare (34) proposed that queen-worker conflict, which is shaped by  
100 relatedness asymmetry within each nest, drives biased sex ratios. Since workers are  
101 more related to their full sisters (average relatedness = 0.75) than to their brothers  
102 (average relatedness = 0.25), workers in single-queen, monandrous colonies should  
103 favor the production of queens over males. Trivers and Hare (34) predicted that worker  
104 interests would prevail in these cases, resulting in female-biased offspring production.  
105 Queens are equally related to male and female offspring, so they should generally favor  
106 a 1:1 sex ratio. In colonies with multiple queens or multiple mates, the low relatedness  
107 reduces this conflict between queens and workers, resulting in weaker selection for  
108 biased sex allocation (34). Although these predictions revolutionized the way that  
109 researchers think about fitness and relatedness in social insect colonies, they are not  
110 ubiquitously upheld in empirical studies (1).

111       Strikingly, some social insect species exhibit a nearly complete segregation of  
112 male and queen production at the colony level, in a phenomenon known as 'split sex  
113 ratio'. This extreme case has been observed in at least 20 different genera of ants,

114 wasps, and bees (35–37). Boomsma and Grafen (36) argued that this pattern is  
115 consistent with worker control of sex ratio in populations with variation in relatedness  
116 asymmetry: workers that are more related than the population average to their  
117 nestmates should favor specializing in the production of new queens (hereafter  
118 "gynes"), while those that are less related than average should specialize in male  
119 production (36, 38). The variation in relatedness asymmetry would emerge from the  
120 number of mates per queen and from the number of queens per colony.

121         The models of Boomsma and Grafen inspired a burst of empirical research on  
122 split sex ratio in ants and other social insects (37, 39–45, 45–53). Ants in the genus  
123 *Formica* emerged as a prominent model system, as a result of their widespread and  
124 well documented variation in sex ratio and social structure (35). Many species exhibit  
125 split sex ratio or highly biased sex ratio (34, 41–45), but not all of these examples follow  
126 predicted patterns based on relatedness asymmetry. Finnish populations of *Formica*  
127 *truncorum* and *F. exsecta* follow theoretical predictions: in colonies with a single queen  
128 (= monogyne), monandrous queens tend to produce gynes, while polyandrous queens  
129 tend to produce males (41, 44, but see 46). A similar pattern was found in monogyne  
130 and polygyne colonies in *F. truncorum* (with polygyne colonies producing males (45)). A  
131 socially polymorphic population of *F. selysi* and a polygynous population of *F. exsecta*  
132 that exhibits variation in relatedness asymmetry deviated from these predicted patterns  
133 (46, 48). Additional studies have identified potential roles of habitat and diet in shaping  
134 sex allocation in *F. podzolica* (44), in *F. exsecta* (49), in *F. aquilonia* (50), as well as  
135 colony needs for queen replacement (51, 55). Finally, although *Wolbachia* is present in  
136 some *Formica* species exhibiting split sex ratio, it does not appear to influence sex ratio  
137 in any system studied so far (52, 53).

138         Taken together, it appears that there are yet missing pieces to the puzzle of how  
139 and why ants achieve a split sex ratio. A meta-analysis attributed only ~25% of the  
140 observed variance in sex allocation to relatedness asymmetry and variation in queen  
141 number (37). Theoretical examinations following from this finding support a possible role  
142 for virgin queens (which would produce only male offspring) or queen replacement (56),  
143 but another possibility is that *sex allocation by queens is itself under genetic control*.

144 Here, we examine the evidence for this mechanism, which could be responsible  
145 for much of the unexplained variance in patterns of split sex ratio. We 1) conduct a  
146 genome-wide association study for variants associated with sex ratio in *Formica*  
147 *glacialis*, 2) infer transmission patterns of sex-ratio-associated variants from colony-level  
148 genotype frequencies, 3) evaluate whether sex ratio and social organization map to the  
149 same region of the genome, and 4) test for a shared genetic basis of sex ratio in the  
150 related species *F. podzolica*.

## 151 Results

152 Through a genome-wide association study (GWAS) of 138 *F. glacialis* whole-  
153 genome sequences, we identify numerous variants associated with colony sex  
154 allocation in a region of chromosome 3 spanning 5.5 Mbp (Figure 1a). A principal  
155 component analysis (PCA) of variants on chromosome 3 reveals three distinct genotype  
156 clusters, one of which is observed in just six individuals (Fig 1b). Of the workers with  
157 low PC2 scores (yellow and green clusters, Fig. 1b) 60.2 % were collected from male-  
158 producing colonies, while 93.3% of workers with high PC2 scores (purple cluster, Fig.  
159 1b) were from gyne-producing colonies. We investigate the parts of chromosome 3  
160 that distinguish the genotype clusters through an assessment of  $F_{ST}$  between the  
161 clusters (Fig. 2). This comparison reveals two adjacent regions of differentiation.  
162 Between the two clusters with low PC1 scores, we observe differentiation spanning the  
163 region from 2-7.5 Mbp (Fig. 2a), similar to the region revealed in the initial GWAS.  
164 Between the two clusters with low PC2 values (both of which harbored an excess of  
165 workers from male producing colonies), we identify a differentiated region from about  
166 7.5-12.5 Mbp, as well as a small peak at 2 Mbp (Fig. 2b).

167 Previous studies found that colony queen number in *F. selysi* (28, 57) and other  
168 European *Formica* species (29) is controlled by a social supergene on chromosome 3.  
169 To determine whether a supergene on chromosome 3 similarly underlies colony queen  
170 number in *F. glacialis*, we investigated variation in 19 additional colonies from other  
171 populations using ddRADseq. Opposing homozygosity among nestmates (i.e. the  
172 presence of two alternative homozygous genotypes in nestmates, which is not possible  
173 in haplodiploid full siblings) reveals substantial variation in colony social structure in this  
174 species (Fig. 3a), and this variation maps to the supergene region (Fig. 3b). In

175 particular, SNPs that are significantly associated with variation in social structure in the  
176 ddRADseq data are localized in the 7.5-12.5 Mbp region (Fig. 3c), corresponding to the  
177 region identified in Fig. 2b.

178 A PCA of markers on chromosome 3 that are shared in the whole genome and  
179 ddRADseq datasets reveals that the colonies that are assessed to be polygyne based  
180 on a high frequency of opposing homozygosity (red, Fig. 3d) consistently harbor one  
181 genotype. This genotype is shared with the six individuals from the whole genome  
182 sequencing library that formed the yellow cluster in Fig. 1b. These individuals are  
183 heterozygous for two alternative supergene haplotypes, one of which appears to occur  
184 exclusively in polygyne colonies. We define this haplotype as the Sp haplotype of *F.*  
185 *glacialis*. We note that the Sp found in other *Formica* species spanned about 10.5 Mbp  
186 of chromosome 3, from 2 Mbp to about 12.5 Mbp (29), while the one identified here in *F.*  
187 *glacialis* is shorter. The remaining two genotype clusters identified in the whole genome  
188 dataset (green and purple clusters, Fig. 1b) both group with workers from colonies  
189 assessed to be monogyne in the ddRADseq dataset based on very low levels of  
190 opposing homozygosity (Fig. 3a). Based on the regions of differentiation among  
191 genotype clusters (Fig. 2), we hypothesized that individuals from the purple cluster carry  
192 two alternative supergene haplotypes in the 2-7.5 Mbp region of chromosome 3  
193 (subsequently confirmed with PCR-RFLP genotyping; Fig. 4). One of these haplotypes  
194 is found almost exclusively in gyne-producing colonies. The other haplotype is usually  
195 homozygous in male-producing colonies. Since one genotype is associated with the  
196 production of daughters in monogyne colonies, we name these alleles after  
197 mythological twins Danaus and Aegyptus, who had 50 daughters and 50 sons,  
198 respectively. Individuals from the gyne-producing cluster (purple, Fig. 1b) have the  
199 genotype Sma/Smd, while those from the predominantly male-producing cluster have  
200 the genotype Sma/Sma (green, Fig. 1b).

201 We developed two PCR-RFLP assays to distinguish these three genotypes in a  
202 larger number of individuals from each of the colonies in the focal population in Yukon  
203 Territory. Workers from gyne-producing colonies are a mix of Sma/Smd heterozygotes  
204 and Sma/Sma homozygotes, while workers from male-producing colonies are most  
205 often Sma/Sma homozygotes or Sp/Sma heterozygotes (Fig. 4a). This suggests that

206 gyne-producing monogyne colonies are usually headed by Sma/Smd queens, while  
207 male producing monogyne colonies are usually headed by Sma/Sma queens (Fig. 4b).  
208 Looking at each colony, we show that 31 out of 34 gyne-producing colonies harbor at  
209 least one Sma/Smd worker out of eight genotyped, while 27 out of 34 male-producing  
210 colonies harbor only Sma/Sma workers and Sma males (Fig. 4c). Among the remaining  
211 male-producing colonies, three harbor only Sp/Sma workers (and are likely polygyne).  
212 Of these, two had Sp males and one had a single Sma male. Four male-producing  
213 colonies host a mix of Sma/Sma and Sma/Smd workers, as well as both Sma and Smd  
214 males. We infer the genotypes of individuals from colonies with known social structure  
215 in the ddRADseq dataset using a set of diagnostic SNPs. Across these additional  
216 populations, we show that two monogyne colonies harbor exclusively Sma/Sma  
217 workers, while nine harbor a mix of Sma/Smd and Sma/Sma workers (Fig. 4d). The  
218 four polygyne colonies all contain Sp/Sma workers; one colony contains a single  
219 Sp/Smd worker as well.

220 We obtained a smaller sample of colonies of *F. podzolica*, the sister species of *F.*  
221 *glacialis*, that exhibited a split sex ratio at the focal site in the Yukon Territory. While the  
222 GWAS analysis is inconclusive (Fig. S1), we observe similar qualitative patterns in the  
223 genomic differentiation between genotype clusters identified in a PCA (Fig. 5).  
224 Individuals from these two PCA clusters (Fig. 5a) exhibit elevated genetic differentiation  
225 from 2-7.5 Mbp along chromosome 3 (Fig. 5b). Gyne-producing colonies harbor a mix of  
226 putative Sma/Smd heterozygotes and Sma/Sma homozygotes. The majority of male-  
227 producing colonies contain exclusively Sma/Sma workers (Fig. 5c). A large number of  
228 SNPs distinguishing Sma and Smd haplotypes are conserved between *F. podzolica* and  
229 *F. glacialis* (Fig. 5d).

## 230 Discussion

231 We demonstrate that a chromosome underlying queen number across the  
232 *Formica* genus is also associated with the split sex ratio patterns observed in a sister  
233 species pair. Sex ratio variation based on queen genotype could account for the many  
234 empirical exceptions (37) to the patterns predicted by Boomsma and Grafen (36, 38). In  
235 *Formica glacialis*, we show that the Smd supergene haplotype behaves like a 'W' sex  
236 chromosome in that it's present almost exclusively in females and in a heterozygous



237 state. A key difference is that it influences the sex ratio of offspring rather than the sex  
238 of the individual bearer. Single-queen gyne-producing colonies generally harbor a mix  
239 of Sma/Smd and Sma/Sma workers, suggesting that the queens are Sma/Smd  
240 heterozygotes crossed with Sma males. Through Mendelian inheritance, half of their  
241 daughters (the heterozygotes) will in turn be gyne-producing queens, while the other  
242 half will be male producers. Males are produced either by homozygous Sma/Sma  
243 single queens or by polygyne (Sp/Sma) queens. We noted a few exceptions to this  
244 pattern in both gyne- and male-producing colonies, suggesting that genetic control is  
245 imperfect. Our focal population was predominantly monogyne, so we do not yet know if  
246 some polygyne colonies specialize in producing gyns.

247 A striking finding of this study is that the extent of the social supergene  
248 discovered in other *Formica* species appears to be split into two adjacent, linked  
249 supergene regions in *F. glacialis*. One half of the supergene, from 2-7.5 Mbp on  
250 chromosome 3, is associated with split sex ratio. The other half, from 7.5-12.5 Mbp,  
251 which includes the gene *knockout* identified as a candidate conserved gene influencing  
252 social structure in other *Formica* species (29), is associated with social structure (Fig.  
253 2).

254 These patterns raise questions about the evolution of the functions of these two  
255 linked supergenes in *F. glacialis* and *F. podzolica*. Theory predicts split sex ratio to  
256 evolve in social hymenopteran populations with variation in relatedness asymmetry. We  
257 propose two alternative scenarios that could explain the evolution of these linked  
258 regions. In one scenario, we speculate that split sex ratio may have evolved in socially  
259 polymorphic *Formica* populations, wherein monogyne and monandrous queens would  
260 specialize in gyne production, while polygyne or polyandrous queens would produce  
261 predominantly males. Such patterns were documented in other *Formica* species,  
262 including *F. truncorum* (42, 58) and Finnish populations of *F. exsecta* (54), although we  
263 note that this pattern is not present in all previously studied *Formica* species (46, 51).  
264 Specialization in offspring sex ratio based on social structure would select for reduced  
265 recombination between loci influencing sex ratio and social structure. In populations  
266 with little relatedness asymmetry, as observed in our predominantly monogyne *F.*  
267 *glacialis* population in the Yukon, rare recombinant supergene haplotypes that decouple

268 social determination from sex ratio determination could spread in the population. In this  
269 case in particular, we suggest that gene flux from the Sp haplotype onto the Sm may  
270 have led to the formation of the Sma haplotype associated with monogyne social  
271 structure and the production of males. Such sex ratio supergene systems may persist in  
272 species with a mix of socially polymorphic and socially monomorphic populations, which  
273 could explain deviations from the theoretical predictions of Boomsma and Grafen (36),  
274 wherein predominantly polygyne populations produce highly male biased sex ratios, as  
275 in Swiss *F. exsecta* (48), or one social form exhibits strongly split sex ratios and the  
276 other is intermediate, as in *F. selysi* (46).

277 In an alternative scenario, a gene or supergene influencing sex ratio could  
278 predate the appearance of persistent social polymorphism; when alternative social  
279 structures emerged, selection for male-biased production in colonies with lower average  
280 relatedness and for gyne-biased production in colonies with higher average relatedness  
281 could have led to the appearance of linked genetic variants favoring one or more  
282 queens. The dual roles of linked supergenes in shaping social organization and sex  
283 ratio in *Formica* species could help to explain why this supergene has persisted for  
284 millions of years (29). Future studies could examine these speculative scenarios by  
285 seeking evidence of sex ratio supergenes in other, distantly related *Formica* species. In  
286 particular, we predict that a supergene like this one could be particularly evident in  
287 stable populations with little relatedness asymmetry.

288 Our study in *F. glacialis* is not the first to identify sex-specific genetic differences  
289 between ant gynes and males (20, 59). However, the mechanisms that produce these  
290 sex-specific genetic differences appear to differ across systems, and none are fully  
291 understood. Kulmuni and Pamilo (59) showed that hybridization between *Formica*  
292 *aquilonia* and *Formica polyctena* results in admixed females, but that surviving males  
293 tend to have a genotype comprised of alleles from only one parental species (59, 60).  
294 They proposed that recessive incompatibilities between the genomes of the two species  
295 are exposed to selection in haploid males. Subsequent research on this system has  
296 revealed instability in the direction of selection on introgressed alleles in males across a  
297 ten-year time interval, with introgression recently favored on average in loci where  
298 introgression was previously selected against (61). In the tawny crazy ant *Nylanderia*

299 *fulva*, males invariably carry the same allele at two out of 12 microsatellite loci, while  
300 females are almost always heterozygous at these loci (20). Diploid eggs that were  
301 homozygous for the male-associated alleles at these loci failed to develop. In *F.*  
302 *glacialis*, we similarly observe a haplotype, Smd, that is found almost exclusively in  
303 females. However, we speculate that the mechanism underlying the sex-specific genetic  
304 differences in *F. glacialis* may not rely on lethal effects of alleles in one sex or the other,  
305 as it appears to in the aforementioned systems. We suggest that the Sma/Smd queens  
306 lay exclusively fertilized eggs, which would preclude the production of males. Further  
307 research is needed in all systems to compare the specific mechanisms maintaining  
308 these genetic differences between the sexes.

309         Some previous empirical discoveries still need further examination in the light of  
310 the newly discovered split sex ratio supergene. Several experimental studies provided  
311 evidence that environmental quality and diet can influence colony sex ratio, including in  
312 a population of *F. podzolica* from central Alberta (44). We posit that there may be as yet  
313 undetected gene x environment interactions, which could explain the rare deviations  
314 from expected genotype distributions in workers from our gyne- and male-producing  
315 colonies. Repeating food supplementation experiments in colonies of known genetic  
316 structure will help to resolve this question. Although the linkage between social and sex  
317 ratio supergenes hints at a role of parent-offspring conflict in shaping split sex ratio in  
318 *Formica* ancestors (34, 38), many questions remain about how worker control could  
319 function in a system with genetic determination of sex ratio. Understanding how the sex  
320 ratio supergene functions will help to illuminate how the contemporary conflict plays out.  
321 For example, does the Smd haplotype cause cessation of haploid egg production?  
322 What factors prevent female offspring of Sma/Sma queens from developing into gynes  
323 instead of workers?

324         Despite limited sampling, we also document an intriguing deviation in the mode  
325 of action of the *F. glacialis* social supergene compared to that of *F. selysi*. Across the  
326 individuals in the RADseq dataset collected from polygyne colonies, we did not detect  
327 any Sp/Sp homozygous individuals (Fig. 4). Polygyne colonies harbored almost  
328 exclusively Sp/Sma workers (N = 30), with only a single Sp/Smd worker. In contrast,

329 polygyne *F. selysi* colonies contain exclusively Sp/Sm and Sp/Sp workers and Sp males  
330 (28, 33, 57). We did not detect systematic variation at the supergene in monogyne *F.*  
331 *selysi* workers (28, 57), but we note that analyses were carried out with relatively sparse  
332 RADseq markers, so it is possible that a small sex ratio supergene could be present in  
333 *F. selysi*.

334 Here, we describe a supergene that drives offspring sex ratio in ants. This sex  
335 ratio supergene is closely linked with a previously described supergene that underlies  
336 colony queen number in *Formica* ants. The discovery that split sex ratio has a genetic  
337 basis helps to resolve the conflicting empirical results about whether and how split sex  
338 ratio emerges to resolve parent-offspring conflict in social hymenopterans. We suggest  
339 that genetic control of sex ratio should be investigated in other social insects,  
340 particularly in those that do not conform to theoretical predictions.

## 341 **Materials and Methods**

### 342 *Sampling and Field Observations*

343 We sampled a mixed population of *F. glacialis* and *F. podzolica* 50 km west of  
344 Whitehorse, Yukon Territory, Canada in July 2016. We removed the top 5-10 cm of soil  
345 from each nest mound and assessed the presence and sex of winged sexuals. When  
346 we observed strongly biased sex ratios (i.e., of the first 10 sexuals examined, at least  
347 nine were of the same sex), we sampled at least eight workers and up to five males. We  
348 did not sample gynes. In total, we sampled 71 *F. glacialis* colonies, of which 34 were  
349 male-producing and 34 gyne-producing. The remaining three sampled colonies  
350 contained no *F. glacialis* sexuals; two of the three also contained workers of the socially  
351 parasitic species *Formica aserva*. We estimate that at least 80% of colonies with  
352 winged sexuals exhibited a biased sex ratio.

### 353 *Whole-genome sequencing*

354 We sequenced 138 genomes of workers from 71 *F. glacialis* colonies. We  
355 extracted Genomic DNA using the Qiagen DNeasy insect tissue protocol and prepared  
356 whole-genome DNA libraries using a low-volume Illumina Nextera protocol (62) with the  
357 following modifications: 2 ng/ $\mu$ L input DNA concentration instead of 0.5 ng/ $\mu$ L,  
358 tagmentation reaction in 5  $\mu$ L volume instead of 2.5  $\mu$ L, PCR using Q5 DNA polymerase  
359 (New England Biolabs) instead of KAPA HiFi, 90 seconds extension time in the thermal

360 cycling program instead of 30 seconds, and a 0.6:1 ratio of magnetic beads to sample in  
361 the magnetic bead clean-up, instead of 1:1 ratio. The libraries were sequenced on an  
362 Illumina HiSeq X-Ten by Novogene, Inc., using 150 bp paired-end reads.

### 363 *Variant calling*

364 We merged overlapping paired-end reads with PEAR v0.9.10 (63), aligned the  
365 reads to the *F. selysi* reference genome (29) using BWA-MEM v0.7.17 (64), and  
366 removed PCR duplicates with Samtools v1.8 (65). We called variants using Samtools  
367 mpileup v1.8 (66) and filtered the genotypes for missing data (20% per locus, --max-  
368 missing 0.8), minor allele count (--mac 2), and minimum depth (--minDP 1) with  
369 VCFtools v0.1.13 (67).

### 370 *Population genetic analyses*

371 We identified regions significantly associated with colony sex ratio in 71 *F.*  
372 *glacialis* colonies (n=138 individuals) by performing a Genome-Wide Association Study  
373 (GWAS) using a univariate linear mixed model implemented in GEMMA v0.94 (68),  
374 using a genetic similarity matrix to control for population structure as a random effect.  
375 Three colonies without a sex ratio phenotype were assigned an "NA" phenotype. Upon  
376 detecting a large region of chromosome 3 significantly associated with sex ratio, we  
377 performed a principal component analysis (PCA) using Plink v1.90b3.38 (69) on  
378 variants on this chromosome. We calculated Weir and Cockerham's  $F_{ST}$  (70) in 10 kbp  
379 windows between the three genotype clusters identified in the PCA using VCFtools  
380 v0.1.13 (67).

### 381 *Comparisons with sister species F. podzolica*

382 We examined the underlying genetics of split sex ratio in the sister species, *F.*  
383 *podzolica*, as well. We sampled 12 colonies (5 male-producing, 7 gyne-producing) from  
384 the same Yukon locality, and sequenced the genomes of 22 workers and called variants  
385 using the same methods as for *F. glacialis*. We identified genetic clusters based on  
386 variants on chromosome 3 and calculated  $F_{ST}$  between genetic clusters, again using the  
387 methods described above for *F. glacialis*. We identified SNPs with alleles specific to the  
388 Smd haplotypes of both species by comparing allele frequencies in four groups: *F.*  
389 *glacialis* Sma/Sma, *F. glacialis* Sma/Smd, *F. podzolica* Sma/Sma, and *F. podzolica*  
390 Sma/Smd. Loci with putative Smd-specific alleles shared between both species were

391 defined as those which have allele frequency between 0.4 and 0.6 in both of the  
392 Sma/Smd groups, and allele frequency  $>0.95$  or  $<0.05$  in both of the Sma/Sma groups.  
393 We plotted the frequency of SNPs meeting these criteria in 10 kbp windows along  
394 chromosome 3.

### 395 *Social Organization*

396 We sampled 8 workers from 19 additional *F. glacialis* colonies in Alaska, British  
397 Columbia, and Alberta, where no winged sexuals were visible at the time of collection.  
398 We genotyped 145 of these workers using the double-digest RAD sequencing protocol  
399 of Brelsford et al. 2016 (71), with restriction enzymes SbfI and MseI. RAD libraries were  
400 sequenced on the Illumina HiSeq 4000 platform by the QB3 Genomics core facility of  
401 University of California Berkeley, with 100bp paired-end reads. We aligned reads and  
402 called variants using the procedures described above for whole-genome data, but  
403 omitting the removal of PCR duplicates. Raw variants were filtered using VCFtools  
404 v0.1.13 (67), retaining genotypes with sequence depth of at least 7 and variants with  
405 genotype calls in at least 80% of samples.

406 To assess social organization of the 19 colonies, we calculated the number of  
407 loci exhibiting opposing homozygosity within each colony, i.e., at least one worker  
408 homozygous for the reference allele and one worker homozygous for the alternate  
409 allele. In haplodiploid organisms, a male transmits the same allele to all of his offspring,  
410 so in a group of full siblings, opposing heterozygosity is expected to be absent except in  
411 the cases of genotyping errors or de novo mutations. Colonies with multiple queens, or  
412 with a multiply mated queen, are expected to have a higher number of loci with  
413 opposing heterozygosity.

414 We conducted a genome-wide association study for variants associated with  
415 colony-level opposing homozygosity using a linear mixed model implemented in  
416 Gemma v0.94 (68), which uses a relatedness matrix to control for non-independence of  
417 samples. Finally, we carried out a principal component analysis of variants on  
418 chromosome 3 on a merged dataset of whole-genome and ddRAD *F. glacialis*  
419 genotypes. We generated a list of variants on chromosome 3 present in both the whole-  
420 genome and ddRAD filtered VCF files, extracted those variants from both datasets, and

421 generated a merged VCF using VCFtools v0.1.13 (67). We used Plink v1.90b3.38 (69)  
422 to carry out a principal component analysis on the resulting merged genotypes.

#### 423 *Colony genotype distributions*

424 We designed a targeted PCR-RFLP assay for a trans-species SNP tagging  
425 alternative chromosome 3 haplotypes in both *F. glacialis* and *F. podzolica*. We designed  
426 primers (CTGGAACAACGGATCCTCA and TTCGCGATTCTGAATTTCTC) to amplify a  
427 338 bp fragment, which, when digested with the restriction enzyme MluCI, produces  
428 fragments of 325 and 13 bp for the haplotype associated with gyne production and 223,  
429 102, and 13 bp for the haplotype associated with male production. We used this assay  
430 to genotype 6 additional workers and any available males for all colonies of both  
431 species.

432 We designed a second PCR-RFLP assay for a trans-species SNP broadly  
433 conserved across *Formica* that differs between Sm and Sp alleles of the gene *knockout*.  
434 Primers GGTGGYTCTTTCAACGACG and GCCATGTTCACCTCCACCA amplify a 230  
435 bp fragment, which when digested with the restriction enzyme HinfI produces fragments  
436 of 132 and 98 bp for the Sm allele and 230 for the Sp allele. We used this assay to  
437 genotype 6 additional workers and any available males from three *F. glacialis* colonies  
438 where initial whole-genome sequencing of two workers identified the presence of the Sp  
439 allele at *knockout*. For both PCR-RFLP assays, we visualized the distinct banding  
440 patterns with 2% agarose gel electrophoresis.

441 We constructed bar plots of supergene genotype frequency by colony based on  
442 whole-genome sequencing and PCR-RFLP genotyping for the Yukon population, and  
443 based on ddRAD for Alaska, Alberta, and British Columbia populations.

444

445 **Competing interest information for all authors**

446 The authors declare no competing interests.

447 **Data Sharing**

448 Raw sequences will be uploaded to NCBI SRA (accession numbers to be determined  
449 pending acceptance). Colony metadata including locality, observed sex ratio, and  
450 inferred social structure is included in Dataset S1.

451 **Acknowledgements and funding sources**

452 This material is based upon work supported by the National Science Foundation  
453 Graduate Research Fellowship to GLR under Grant No. DGE-1326120, by NSF DEB  
454 grant 1733437 to AB and JP, and by U. S. Department of Agriculture National Institute  
455 of Food and Agriculture Hatch #CA-R-ENT-5126-H to JP. This work used the Vincent J.  
456 Coates Genomics Sequencing Laboratory at UC Berkeley, supported by NIH S10  
457 OD018174 Instrumentation Grant. The authors thank K. Martinez, Z. Alam, and A.  
458 Klement for their assistance in the lab.

459

460



461 **References**

- 462 1. S. West, *Sex Allocation* (Princeton University Press, 2009).
- 463 2. A. Gardner, I. C. W. Hardy, P. D. Taylor, S. A. West, Spiteful Soldiers and Sex Ratio  
464 Conflict in Polyembryonic Parasitoid Wasps. *The American Naturalist* **169**, 519–533  
465 (2007).
- 466 3. K. Tsuchida, *et al.*, Queen-Worker Conflicts Over Male Production and Sex Allocation in a  
467 Primitively Eusocial Wasp. *Evolution* **57**, 2365–2373 (2003).
- 468 4. J. Komdeur, S. Daan, J. Tinbergen, C. Mateman, Extreme adaptive modification in sex  
469 ratio of the Seychelles warbler's eggs. *Nature* **385**, 522–525 (1997).
- 470 5. N. Khwaja, B. J. Hatchwell, R. P. Freckleton, J. P. Green, Sex Allocation Patterns across  
471 Cooperatively Breeding Birds Do Not Support Predictions of the Repayment Hypothesis.  
472 *The American Naturalist* **190**, 547–556 (2017).
- 473 6. J. H. Werren, S. W. Skinner, E. L. Charnov, Paternal inheritance of a daughterless sex  
474 ratio factor. *Nature* **293**, 467–468 (1981).
- 475 7. J. H. Werren, The Paternal-Sex-Ratio Chromosome of *Nasonia*. *The American Naturalist*  
476 **137**, 392–402 (1991).
- 477 8. J. C. Aldrich, A. Leibholz, M. S. Cheema, J. Ausiό, P. M. Ferree, A 'selfish' B chromosome  
478 induces genome elimination by disrupting the histone code in the jewel wasp *Nasonia*  
479 *vitripennis*. *Scientific Reports* **7**, 42551 (2017).
- 480 9. R. Stouthamer, J. a. J. Breeuwer, R. F. Luck, J. H. Werren, Molecular identification of  
481 microorganisms associated with parthenogenesis. *Nature* **361**, 66–68 (1993).
- 482 10. W.-J. Ma, T. Schwander, Patterns and mechanisms in instances of endosymbiont-induced  
483 parthenogenesis. *Journal of Evolutionary Biology* **30**, 868–888 (2017).
- 484 11. L. D. Hurst, Intragenomic conflict as an evolutionary force. *Proceedings of the Royal*  
485 *Society of London. Series B: Biological Sciences* **248**, 135–140 (1992).
- 486 12. A. K. Chippindale, J. R. Gibson, W. R. Rice, Negative genetic correlation for adult fitness  
487 between sexes reveals ontogenetic conflict in *Drosophila*. *PNAS* **98**, 1671–1675 (2001).
- 488 13. T. M. Pennell, L. Holman, E. H. Morrow, J. Field, Building a new research framework for  
489 social evolution: intralocus caste antagonism. *Biological Reviews* **93**, 1251–1268 (2018).
- 490 14. D. Charlesworth, B. Charlesworth, G. Marais, Steps in the evolution of heteromorphic sex  
491 chromosomes. *Heredity* **95**, 118–128 (2005).
- 492 15. S. Ponnikas, H. Sigeman, J. K. Abbott, B. Hansson, Why Do Sex Chromosomes Stop  
493 Recombining? *Trends in Genetics* **34**, 492–503 (2018).
- 494 16. L. Altenberg, M. W. Feldman, Selection, Generalized Transmission and the Evolution of  
495 Modifier Genes. I. The Reduction Principle. *Genetics* **117**, 559–572 (1987).
- 496 17. Y. Tao, J. P. Masly, L. Araripe, Y. Ke, D. L. Hartl, A sex-ratio Meiotic Drive System in  
497 *Drosophila simulans*. I: An Autosomal Suppressor. *PLOS Biology* **5**, e292 (2007).
- 498 18. K. A. Paczolt, J. A. Reinhardt, G. S. Wilkinson, Contrasting patterns of X-chromosome  
499 divergence underlie multiple sex-ratio polymorphisms in stalk-eyed flies. *Journal of*  
500 *Evolutionary Biology* **30**, 1772–1784 (2017).
- 501 19. K. A. Dyer, D. W. Hall, Fitness consequences of a non-recombining sex-ratio drive  
502 chromosome can explain its prevalence in the wild. *Proceedings of the Royal Society B:*  
503 *Biological Sciences* **286** (2019).
- 504 20. P.-A. Eyer, A. J. Blumenfeld, E. L. Vargo, Sexually antagonistic selection promotes genetic  
505 divergence between males and females in an ant. *Proceedings of the National Academy of*  
506 *Sciences* **116**, 24157–24163 (2019).
- 507 21. M. Joron, *et al.*, Chromosomal rearrangements maintain a polymorphic supergene  
508 controlling butterfly mimicry. *Nature* **477**, 203–206 (2011).
- 509 22. E. M. Tuttle, *et al.*, Divergence and Functional Degradation of a Sex Chromosome-like  
510 Supergene. *Current Biology* **26**, 344–350 (2016).
- 511 23. S. Lamichhaney, *et al.*, Structural genomic changes underlie alternative reproductive

- 512 strategies in the ruff ( *Philomachus pugnax* ). *Nature Genetics* **48**, 84–88 (2016).
- 513 24. C. Küpper, *et al.*, A supergene determines highly divergent male reproductive morphs in  
514 the ruff. *Nature Genetics* **48**, 79–83 (2016).
- 515 25. S. Sun, M. A. Coelho, J. Heitman, M. Nowrousian, Convergent evolution of linked mating-  
516 type loci in basidiomycete fungi. *PLOS Genetics* **15**, e1008365 (2019).
- 517 26. S. Takayama, A. Isogai, Self-Incompatibility in Plants. *Annual Review of Plant Biology* **56**,  
518 467–489 (2005).
- 519 27. J. Wang, *et al.*, A Y-like social chromosome causes alternative colony organization in fire  
520 ants. *Nature* **493**, 664–668 (2013).
- 521 28. J. Purcell, A. Brelsford, Y. Wurm, N. Perrin, M. Chapuisat, Convergent Genetic  
522 Architecture Underlies Social Organization in Ants. *Current Biology* **24**, 2728–2732 (2014).
- 523 29. A. Brelsford, *et al.*, An Ancient and Eroded Social Supergene Is Widespread across  
524 *Formica* Ants. *Current Biology* **30**, 304–311.e4 (2020).
- 525 30. Z. Yan, *et al.*, Evolution of a supergene that regulates a trans-species social  
526 polymorphism. *Nature Ecology & Evolution* **4**, 240–249 (2020).
- 527 31. L. Keller, K. G. Ross, Selfish genes: a green beard in the red fire ant. *Nature* **394**, 573–575  
528 (1998).
- 529 32. K. G. Ross, D. Shoemaker, Unexpected patterns of segregation distortion at a selfish  
530 supergene in the fire ant *Solenopsis invicta*. *BMC Genetics* **19**, 101 (2018).
- 531 33. A. Avril, J. Purcell, S. Béniguel, M. Chapuisat, Maternal effect killing by a supergene  
532 controlling ant social organization. *PNAS* **117**, 17130–17134 (2020).
- 533 34. R. L. Trivers, H. Hare, Haploidploidy and the evolution of the social insect. *Science* **191**,  
534 249–263 (1976).
- 535 35. P. Pamilo, R. Rosengren, Sex Ratio Strategies in *Formica* Ants. *Oikos* **40**, 24–35 (1983).
- 536 36. J. J. Boomsma, A. Grafen, Intraspecific Variation in Ant Sex Ratios and the Trivers-Hare  
537 Hypothesis. *Evolution* **44**, 1026–1034 (1990).
- 538 37. J. Meunier, S. A. West, M. Chapuisat, Split sex ratios in the social Hymenoptera: a meta-  
539 analysis. *Behav Ecol* **19**, 382–390 (2008).
- 540 38. J. J. Boomsma, A. Grafen, Colony-level sex ratio selection in the eusocial Hymenoptera.  
541 *Journal of Evolutionary Biology* **4**, 383–407 (1991).
- 542 39. D. C. Queller, J. E. Strassmann, Kin Selection and Social Insects. *BioScience* **48**, 165–175  
543 (1998).
- 544 40. M. Chapuisat, L. Keller, Testing kin selection with sex allocation data in eusocial  
545 Hymenoptera. *Heredity* **82**, 473–478 (1999).
- 546 41. M. Reuter, L. Keller, Sex Ratio Conflict and Worker Production in Eusocial Hymenoptera.  
547 *The American Naturalist* **158**, 166–177 (2001).
- 548 42. L. Sundström, Sex ratio bias, relatedness asymmetry and queen mating frequency in ants.  
549 *Nature* **367**, 266–268 (1994).
- 550 43. P. Pamilo, P. Seppä, Reproductive competition and conflicts in colonies of the ant *Formica*  
551 *sanguinea*. *Animal Behaviour* **48**, 1201–1206 (1994).
- 552 44. R. J. Deslippe, R. Savolainen, Sex Investment in a Social Insect: The Proximate Role of  
553 Food. *Ecology* **76**, 375–382 (1995).
- 554 45. L. Sundström, Sex Allocation and Colony Maintenance in Monogyne and Polygyne  
555 Colonies of *Formica truncorum* (Hymenoptera: Formicidae): The Impact of Kinship and  
556 Mating Structure. *The American Naturalist* **146**, 182–201 (1995).
- 557 46. H. Rosset, M. Chapuisat, Sex Allocation Conflict in Ants: When the Queen Rules. *Current*  
558 *Biology* (2006).
- 559 47. E. Vitikainen, C. Haag-Liautard, L. Sundström, Inbreeding and Reproductive Investment in  
560 the Ant *Formica exsecta*. *Evolution* **65**, 2026–2037 (2011).
- 561 48. W. D. Brown, L. Keller, Colony sex ratios vary with queen number but not relatedness  
562 asymmetry in the ant *Formica exsecta*. *Proceedings of the Royal Society of London*.

- 563 *Series B: Biological Sciences* **267**, 1751–1757 (2000).
- 564 49. W. D. Brown, L. Keller, Resource supplements cause a change in colony sex-ratio  
565 specialization in the mound-building ant, *Formica exsecta*. *Behav Ecol Sociobiol* **60**, 612–  
566 618 (2006).
- 567 50. J. Sorvari, H. Hakkarainen, Wood ants are wood ants: deforestation causes population  
568 declines in the polydomous wood ant *Formica aquilonia*. *Ecological Entomology* **32**, 707–  
569 711 (2007).
- 570 51. W. D. Brown, L. Keller, Queen recruitment and split sex ratios in polygynous colonies of  
571 the ant *Formica exsecta*. *Ecology Letters* **5**, 102–109 (2002).
- 572 52. L. Keller, *et al.*, Sex ratio and Wolbachia infection in the ant *Formica exsecta*. *Heredity* **87**,  
573 227–233 (2001).
- 574 53. T. Wenseleers, L. Sundström, J. Billen, Deleterious Wolbachia in the ant *Formica*  
575 *truncorum*. *Proceedings of the Royal Society of London. Series B: Biological Sciences* **269**,  
576 623–629 (2002).
- 577 54. L. Sundström, M. Chapuisat, L. Keller, Conditional Manipulation of Sex Ratios by Ant  
578 Workers: A Test of Kin Selection Theory. *Science* **274**, 993–995 (1996).
- 579 55. R. Kümmerli, K. R. Helms, L. Keller, Experimental manipulation of queen number affects  
580 colony sex ratio investment in the highly polygynous ant *Formica exsecta*. *Proceedings of*  
581 *the Royal Society B: Biological Sciences* **272**, 1789–1794 (2005).
- 582 56. A. Gardner, J. Alpedrinha, S. A. West, Haplodiploidy and the Evolution of Eusociality: Split  
583 Sex Ratios. *The American Naturalist* **179**, 240–256 (2012).
- 584 57. A. Avril, J. Purcell, A. Brelsford, M. Chapuisat, Asymmetric assortative mating and queen  
585 polyandry are linked to a supergene controlling ant social organization. *Molecular Ecology*  
586 **28**, 1428–1438 (2019).
- 587 58. L. Sundström, L. W. Ratnieks, Sex ratio conflicts, mating frequency, and queen fitness in  
588 the ant *Formica truncorum*. *Behav Ecol* **9**, 116–121 (1998).
- 589 59. J. Kulmuni, P. Pamilo, Introgression in hybrid ants is favored in females but selected  
590 against in males. *Proceedings of the National Academy of Sciences* **111**, 12805–12810  
591 (2014).
- 592 60. J. Kulmuni, B. Seifert, P. Pamilo, Segregation distortion causes large-scale differences  
593 between male and female genomes in hybrid ants. *Proceedings of the National Academy*  
594 *of Sciences* **107**, 7371–7376 (2010).
- 595 61. J. Kulmuni, *et al.*, Instability of natural selection at candidate barrier loci underlying  
596 speciation in wood ants. *Molecular Ecology* **29**, 3988–3999 (2020).
- 597 62. M. Baym, *et al.*, Inexpensive Multiplexed Library Preparation for Megabase-Sized  
598 Genomes. *PLOS ONE* **10**, e0128036 (2015).
- 599 63. J. Zhang, K. Kobert, T. Flouri, A. Stamatakis, PEAR: a fast and accurate Illumina Paired-  
600 End reAd mergeR. *Bioinformatics* **30**, 614–620 (2014).
- 601 64. H. Li, Aligning sequence reads, clone sequences and assembly contigs with BWA-MEM.  
602 *arXiv:1303.3997 [q-bio]* (2013) (November 19, 2020).
- 603 65. H. Li, *et al.*, The Sequence Alignment/Map format and SAMtools. *Bioinformatics* **25**, 2078–  
604 2079 (2009).
- 605 66. H. Li, A statistical framework for SNP calling, mutation discovery, association mapping and  
606 population genetical parameter estimation from sequencing data. *Bioinformatics* **27**, 2987–  
607 2993 (2011).
- 608 67. P. Danecek, *et al.*, The variant call format and VCFtools. *Bioinformatics* **27**, 2156–2158  
609 (2011).
- 610 68. X. Zhou, M. Stephens, Genome-wide efficient mixed-model analysis for association  
611 studies. *Nature Genetics* **44**, 821–824 (2012).
- 612 69. S. Purcell, *et al.*, PLINK: A Tool Set for Whole-Genome Association and Population-Based  
613 Linkage Analyses. *The American Journal of Human Genetics* **81**, 559–575 (2007).

- 614 70. B. S. Weir, C. C. Cockerham, Estimating F-Statistics for the Analysis of Population  
615 Structure. *Evolution* **38**, 1358–1370 (1984).
- 616 71. A. Brelsford, C. Dufresnes, N. Perrin, High-density sex-specific linkage maps of a  
617 European tree frog ( *Hyla arborea* ) identify the sex chromosome without information on  
618 offspring sex. *Heredity* **116**, 177–181 (2016).
- 619  
620  
621

622 **Figures**

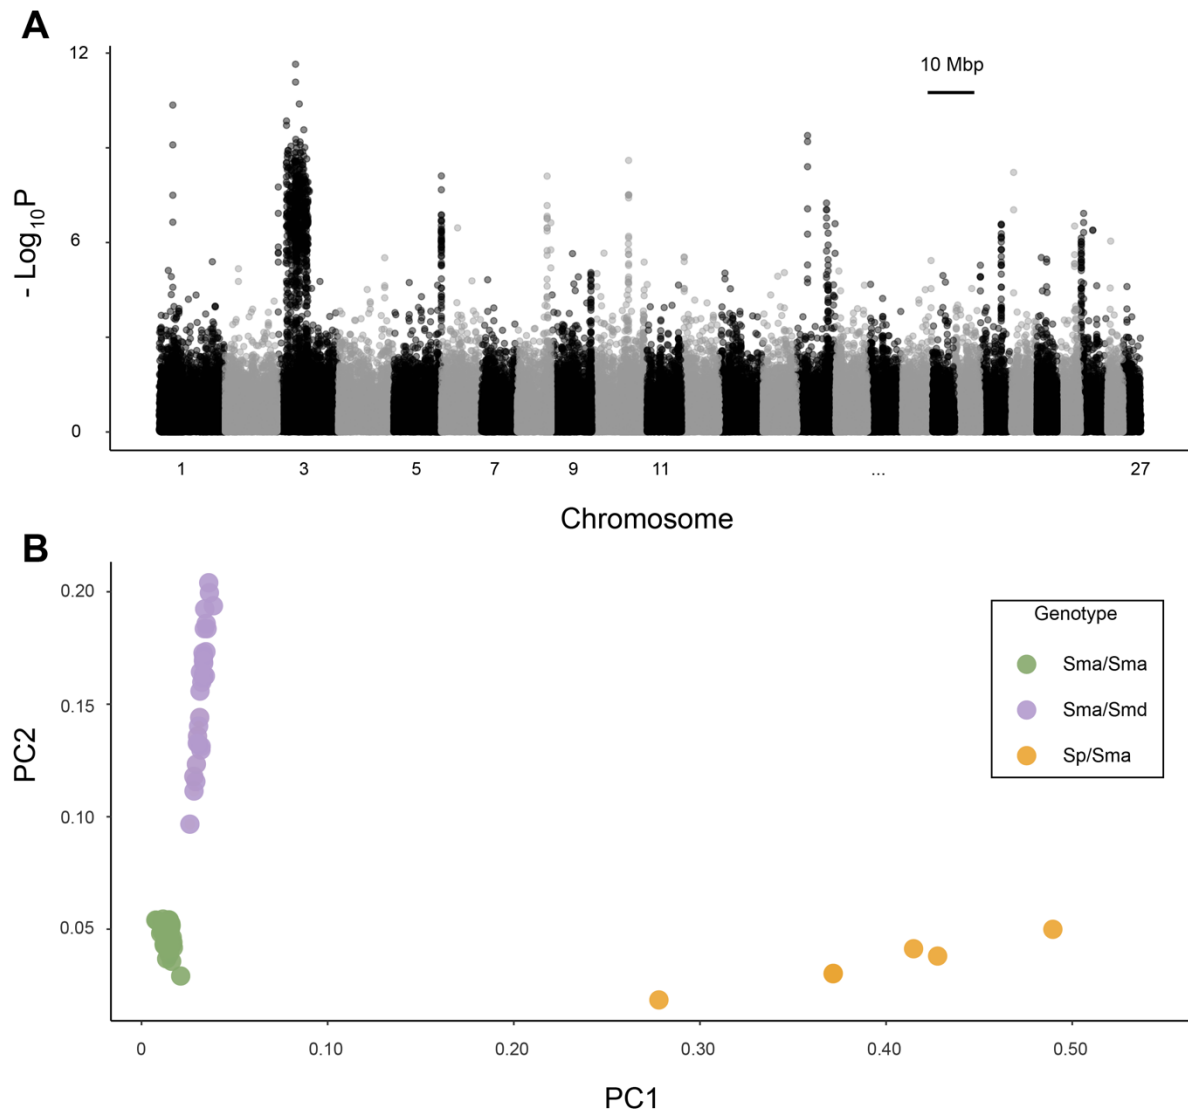

623  
624 Figure 1. (A) A genome-wide association study reveals a large region on chromosome 3  
625 significantly associated with colony sex ratio in *F. glacialis*. (B) A principal component analysis  
626 (PCA) of variants on chromosome 3 identifies three clusters corresponding to three genotypes,  
627 Sma/Sma (green), Sma/Smd (purple), and Sp/Sma (yellow).

628

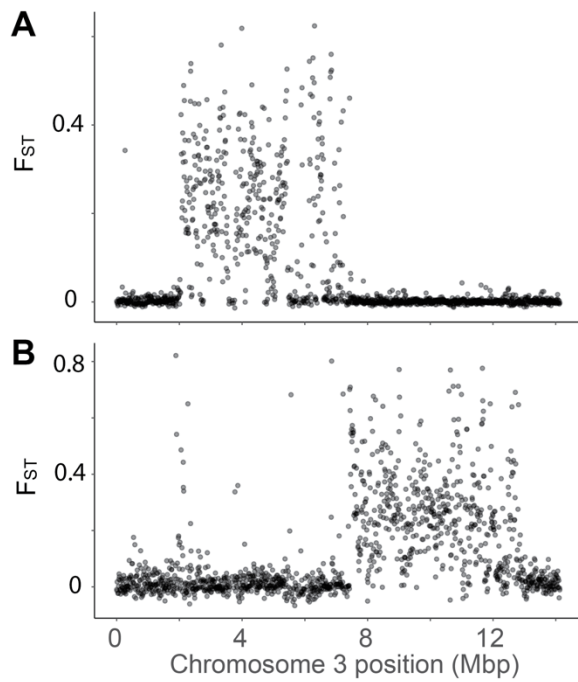

629

630 Figure 2. Genetic differentiation between individuals with alternative genotypes on chromosome  
631 3 reveals two adjacent supergenes in *F. glacialis*. (A) Sma/Sma workers and Sma/Smd workers  
632 exhibit elevated  $F_{ST}$  between 2 Mbp and 7.5 Mbp. (B) Sma/Sma workers and Sp/Sma workers  
633 exhibit elevated  $F_{ST}$  between 7.5 Mbp and 12.5 Mbp, with a small peak at 2 Mbp. Points  
634 represent 10 kbp windows.

635

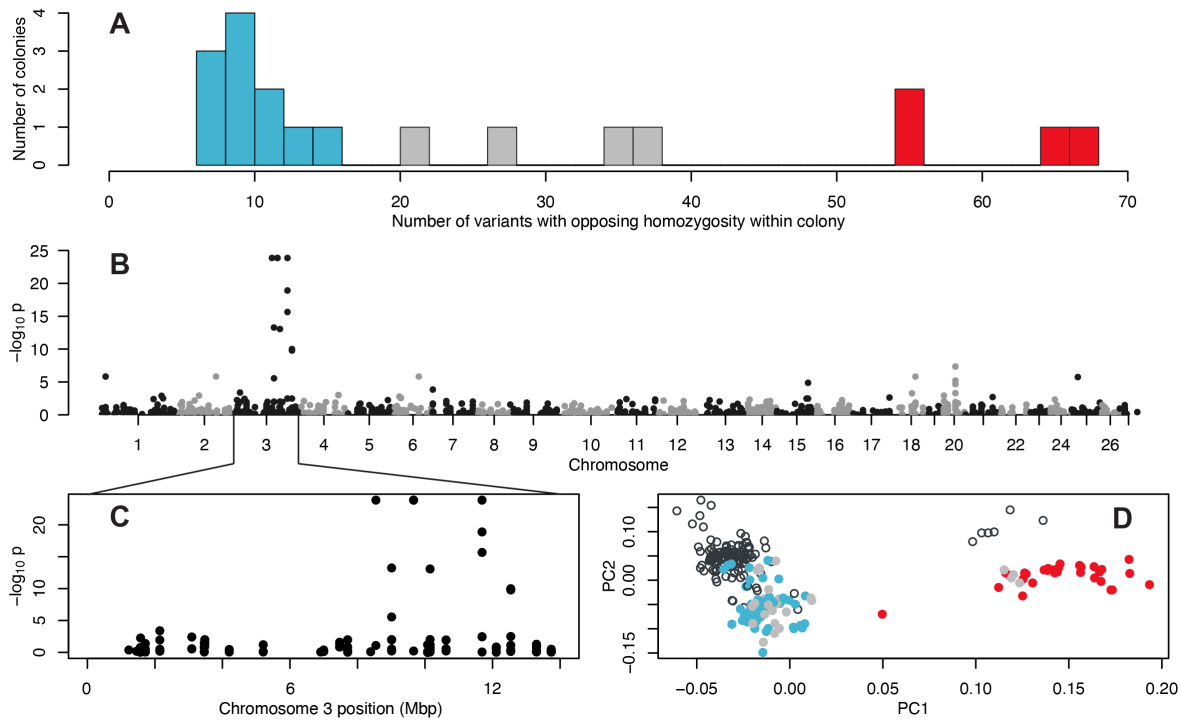

636

637 Figure 3. The Sp supergene haplotype is associated with polygyne social structure in *F. glacialis*  
638 from Alaska, British Columbia, and Alberta, based on RADseq genotyping of 7-8 workers from  
639 each of 19 colonies. (A) Opposing homozygosity varies among colonies. Putative monogyne  
640 colonies are colored blue, putative polygyne colonies are colored red, and undetermined are  
641 colored gray. (B) GWAS revealed multiple SNPs associated with colony-level opposing  
642 homozygosity on chromosome 3. (C) Significantly associated SNPs occur within the 7.5-12.5  
643 Mbp region, also identified in the Yukon population and shown in Fig. 2b. (D) A PCA of variants  
644 in both the RADseq (filled circles) and whole genome datasets (open circles) shows that the Sp  
645 haplotype identified in the Yukon population clusters with the haplotype associated with  
646 polygyne social structure in other populations. The majority of individuals from the Yukon cluster  
647 with workers from monogyne colonies in other populations.

648

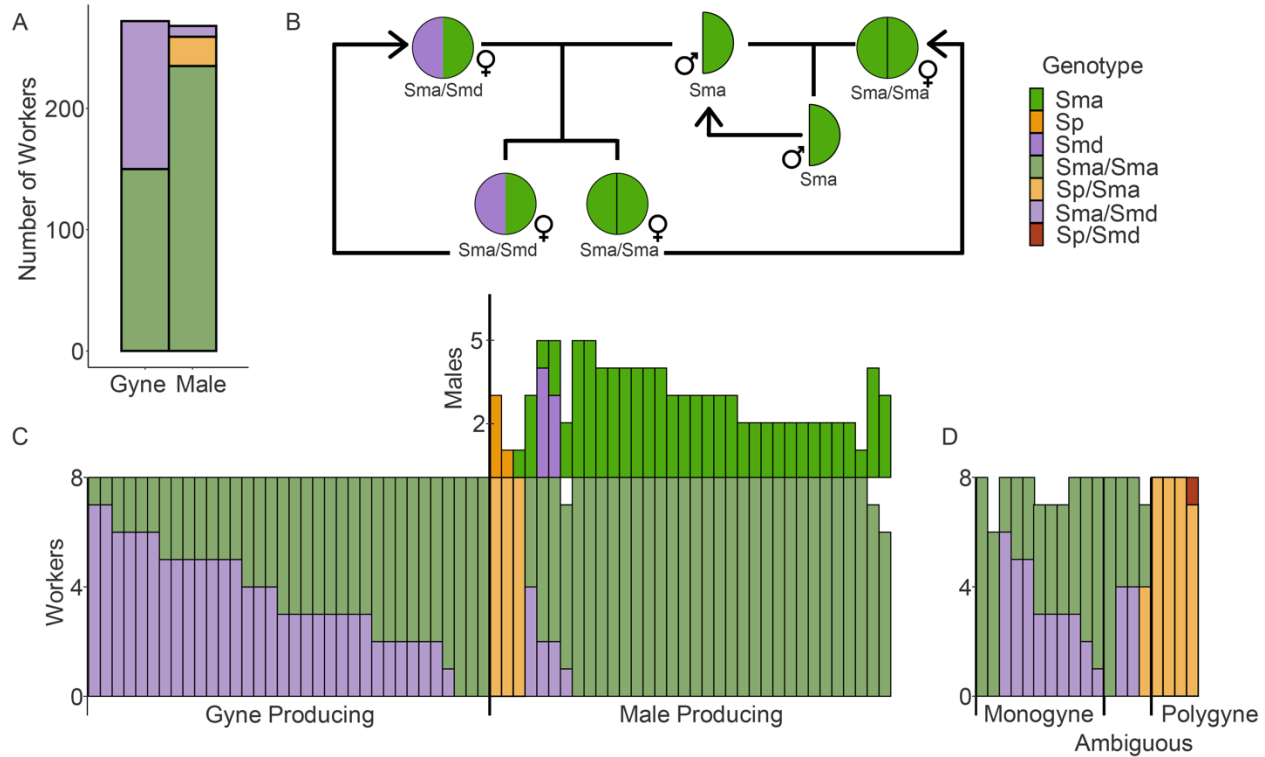

649

650 Figure 4. (A) The Sma/Smd genotype in *F. glacialis* occurs in approximately half of workers from  
 651 gyne-producing colonies, and is rare in workers from male-producing colonies. (B) We propose  
 652 a model of Mendelian inheritance for maintenance of this supergene system in a largely  
 653 monogyne population. Heterozygous queens (Sma/Smd) mated with a Sma male produce  
 654 exclusively female offspring with Sma/Smd and Sma/Sma genotypes. Gynes with the  
 655 heterozygous genotype become gyne-producers, while homozygotes become male-producers.  
 656 (C) Gyne-producing colonies usually harbor a mix of Sma/Sma and Sma/Smd workers (31/34  
 657 colonies). Male-producing colonies usually contain exclusively Sma/Sma workers and produce  
 658 Sma males (27/34 colonies). Three additional male-producing colonies contain exclusively  
 659 Sp/Sma workers and either Sp or Sma males. We did not detect Sma/Smd workers in three  
 660 gyne-producing colonies, while we found at least one Sma/Smd worker in four male-producing  
 661 colonies, indicating that the genetic basis of split sex ratio is imperfect in this system. (D)  
 662 Among monogyne colonies from the broader geographic sample, two contain exclusively  
 663 Sma/Sma workers, while nine contain Sma/Sma and Sma/Smd workers. All workers from  
 664 polygyne colonies carry one Sp haplotype. The majority are Sp/Sma, and we detected one  
 665 Sp/Smd worker.

666



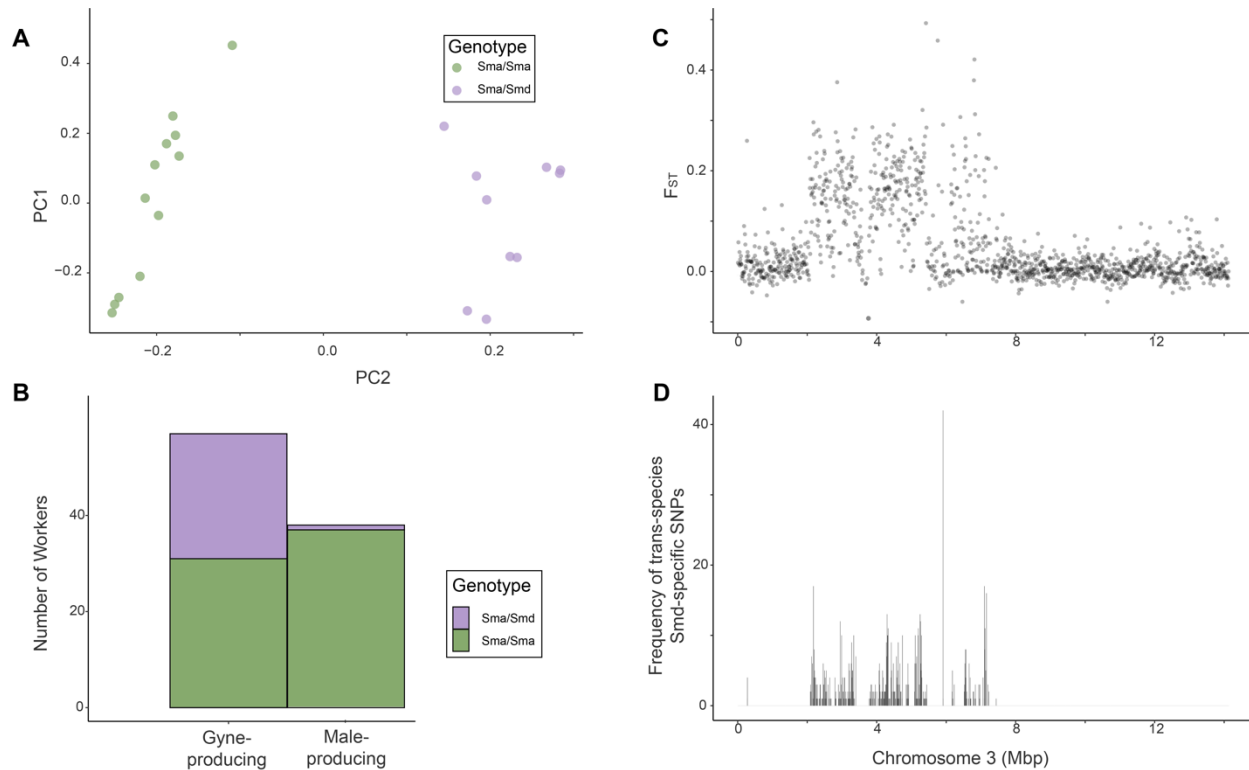

667

668 Figure 5. Alternative genotypes matching those detected in *F. glacialis* are also associated with  
669 colony sex ratio in *Formica podzolica*. (A) A PCA of genetic markers on chromosome 3 reveals  
670 two genotype clusters, Sma/Sma (green) and Sma/Smd (purple). (B) Among workers from  
671 gyne-producing colonies, about half carry the Sma/Sma genotype and half carry the Sma/Smd  
672 genotype. In contrast, workers from male-producing colonies are almost exclusively Sma/Sma.  
673 (C) In *F. podzolica*, the region of elevated  $F_{ST}$  between Sma/Sma and Sma/Smd workers  
674 spanned 2-7.5 Mbp along chromosome 3. Points represent 10 kbp windows. (D) The *F.*  
675 *glacialis* and *F. podzolica* sex ratio supergenes contain shared SNPs between the putative  
676 homologous haplotypes.

677

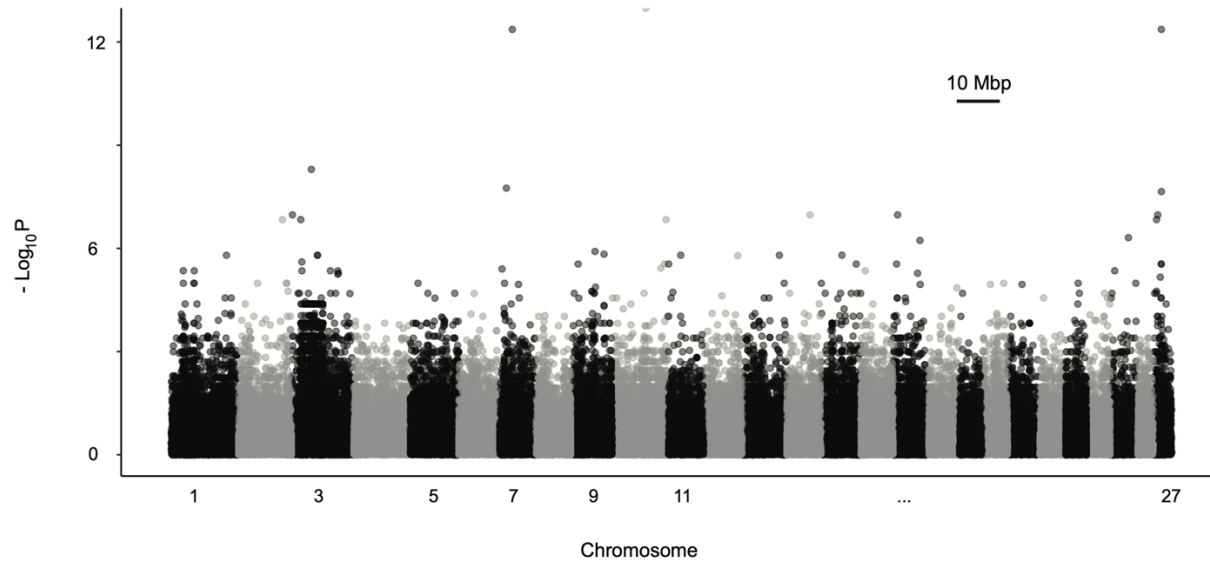

678

679 **Fig. S1.** Manhattan plot of GWAS results in *Formica podzolica* shows no clear association between  
680 colony sex ratio and chromosome 3 supergene region based on 22 sequenced workers from seven gyne-  
681 producing and five male-producing colonies.

682
